# Supplementary material for: Clinical Validation of Moni-Patch TM for Perioperative Core Temperature Monitoring: A Prospective Observational Study Comparing with Esophageal Temperature Measurements
Source: Research Square preprint supplement (doi:10.21203/rs.3.rs-7418450/v1), 2025-09-09
Supplement: Supplementary file 1 [file 199a5f5e60c21b6e1141d1f9.docx]

Title:

Clinical Validation of Moni-PatchTM for Perioperative Core Temperature Monitoring: A Prospective Observational Study Comparing with Esophageal Temperature Measurements

journal name:

Journal of Clinical Monitoring and Computing

author names:

Soichi Tanaka1, Noriaki Nishihara1,2, Shunsuke Tachibana1,*, Michiaki Yamakage1

1. Department of Anesthesiology, Sapporo Medical University School of Medicine, Sapporo, Japan

2. Department of Anesthesiology, Kushiro City General Hospital, Kushiro, Japan

Author Information

Soichi Tanaka, MD

Department of Anesthesiology, Sapporo Medical University School of Medicine, Sapporo, Japan ✉️ Corresponding author: soichi.t321@gmail.com

*Wireless temperature monitoring device*

This wireless temperature monitoring device system consists of two parts, separated by stick-on type thermistor sensor (a) and receiver (b). The thermistor sensor is patched on the proper measurement location, thereafter, it can measure the core body temperature and get temperature information. Next this temperature information is directly connected one-to-one to the receiver via Bluetooth (c). The sensor can be used up to 60 times repeatedly with double-sided tape. The battery of thermistor built into the sensor lasts for 720 hours, and the receiver can be used 480 hours of continuous operation with AAA batteries.

*Principle*

Moni-Patch is based on the principle of the corrected-heat flux method. Thermistor sensor was covered with two layers of insulation, the epidermal temperature is close to the deep body temperature (standard temperature). Heat flux sensor can measure the top and bottom temperatures by sandwiching the resin between them. Covered with a material with low insulation properties to easily capture heat flow and loss in the human body (from core body temperature into body surface temperature) and finally calculate correction values. Core body temperature values are displayed as the sum of the standard temperature values and the correction values.
